# Supplementary material for: Influence of No-Till Practices on the Organic Matter Chemical Composition of Protocalcic, Endocalcic and Pantocalcic Chernozems
Source: Preprints.org preprint supplement (doi:10.20944/preprints202111.0475.v1), 2021-11-25
Supplement: Supplementary file 1 [file supplementary]

**Supporting information**

**Article title: Influence no-till practice on the chemical composition of organic matter of Protocalcic, Endocalcic, and Pantocalcic Chernozems**

**Authors:** Vladimir Kholodov, Yulian Farkhodov, Nadezhda Yaroslavtseva, Svyatoslav Maximovich, Sergei Yudin, Nikita Ermolaev, Victor Dridiger, Boris Ilyin, Vladimir Lazarev, Victor Belobrov

**The following supporting information is available for this article:**

**Table S1.** A list of pyrolysates, corresponding retention time (RT) and characteristic ion (m/z) for thermolabile organic matter (TL OM).

**Fig S1.** An example of determination the indoles in TL OM: selective ion current for m/z 117 (Pantocalcic Chernozem, NT).

**Table S2.** An averages and standard deviations for relative abundance (averages, %) of individual substances and chemical groups for thermolabile organic matter of Chernozems of different land management.

**Table S3.** An eigenvectors from PCA of TL OM composition.

**Table S4.** A list of pyrolysates, corresponding retention time (RT), and classes (accordingly

to origin or chemical structure) for thermostabile organic matter (TS OM).

**Table S5.** An averages and standard deviations for relative abundance (averages, %) of compounds groups and individual substances for thermostable organic matter of Chernozems of different land management.

**Table S6.** An eigenvectors from PCA of TS OM composition.

**Table S1.** A list of pyrolysates and corresponding retention time (RT) and characteristic ion (m/z) for thermolabile organic matter (TL OM).

| Compound | Characteristic ion, m/z | Rt, min |
| --- | --- | --- |
| Pyridine | 79 | 5.69 |
| 2-Cyclopenten-1-one | 82 | 7.59 |
| 3-Furaldehyde | 96 | 8.19 |
| Furfural | 96 | 8.73 |
| Pyrrole | 67 | 9.32 |
| Methylpyrrole I | 80 | 9.74 |
| Methylpyrrole II | 80 | 9.95 |
| 2-Furancarboxaldehyde, 5-methyl- | 110 | 10.06 |
| Indoles | 117 | 10-11 see Fig.1S |
| Methylphenol I | 108 | 14.70 |
| Phenol | 94 | 14.77 |
| 1H-Pyrrole-2-carboxaldehyde | 95 | 15.06 |
| Methylphenol II | 108 | 15.50 |
| Methylphenol III | 108 | 15.59 |

Roman numbers indicate isomers with an indefinite position of the deputy

**Fig S1.** An example of determination the indoles in TL OM: selective ion current for m/z 117 (Pantocalcic Chernozem, NT).

**Table S2.** Averages and standard deviations for relative abundance (averages, %) of individual substances and chemical groups for thermolabile organic matter of Chernozems of different land management.

| Averages | | | | | | |
| --- | --- | --- | --- | --- | --- | --- |
| Chernozems | Protocalcic | | Endocalcic | | Pantocalcic | |
| Land managment | NT | CT | NT | CT | NT | CT |
| Pyridine | 2 | 2 | 2 | 9 | 2 | 2 |
| 2-Cyclopenten-1-one | 5 | 4 | 1 | 4 | 1 | 1 |
| 3-Furaldehyde | 10 | 12 | 11 | 6 | 5 | 4 |
| Furfural | 56 | 62 | 43 | 24 | 12 | 11 |
| Pyrroles | 2 | 3 | 6 | 18 | 8 | 7 |
| 2-Furancarboxaldehyde, 5-methyl- | 6 | 6 | 2 | 4 | 1 | 1 |
| Indoles | 12 | 5 | 26 | 22 | 61 | 63 |
| Phenol | 2 | 3 | 5 | 10 | 7 | 7 |
| 1H-Pyrrole-2-carboxaldehyde | 3 | 3 | 1 | 1 | 1 | 1 |
| Me-phenols | 1 | 1 | 1 | 3 | 2 | 2 |
| Standard deviations | | | | | | |
| Chernozems | Protocalcic | | Endocalcic | | Pantocalcic | |
| Land managment | NT | CT | NT | CT | NT | CT |
| Pyridine | 0.4 | 0.2 | 3 | 6 | 1 | 3 |
| 2-Cyclopenten-1-one | 0.8 | 1.2 | 0.4 | 2 | 0.8 | 2 |
| 3-Furaldehyde | 1.0 | 1.2 | 2 | 3 | 1 | 2 |
| Furfural | 6 | 5 | 9 | 8 | 3 | 6 |
| Pyrroles | 0.8 | 2 | 5 | 10 | 4 | 8 |
| 2-Furancarboxaldehyde, 5-methyl- | 0.6 | 0.8 | 0.4 | 1 | 0.3 | 1 |
| Indoles | 8 | 3 | 6 | 16 | 9 | 23 |
| Phenol | 0.2 | 1 | 2 | 5 | 2 | 4 |
| 1H-Pyrrole-2-carboxaldehyde | 0.5 | 0.6 | 0.4 | 0.6 | 0.5 | 0.6 |
| Me-phenols | 0.1 | 0.4 | 0.4 | 0.5 | 0.8 | 1 |

**Table S2.** An eigenvectors from PCA of TL OM composition.

| Compound | PC1 | Compound | PC2 |
| --- | --- | --- | --- |
| **Mephenols** | **0.389** | **Indole** | **0.393** |
| **Phenol** | **0.383** | Furaldehyde | 0.319 |
| **Pyrroles** | **0.31** | H-Pyrrole-2-carboxaldehyde | 0.173 |
| Indole | 0.292 | Furfural | 0.095 |
| Pyridine | -0.027 | Mephenols | 0.018 |
| H-Pyrrole-2-carboxaldehyde | -0.276 | Phenol | -0.11 |
| Cyclopenten-1-one | -0.297 | Furancarboxaldehyde-5-methyl | -0.226 |
| **Furaldehyde** | **-0.301** | Pyrroles | -0.353 |
| **Furancarboxaldehyde-5-methyl** | **-0.359** | Cyclopenten-1-one | **-0.373** |
| **Furfural** | **-0.37** | **Pyridine** | **-0.615** |

Bold font highlighted the greatest values in the module

**Table S3.** A list of pyrolysates, corresponding retention time (RT) and classes (accordingly to origin or chemical structure) for thermostabile organic matter (TS OM)

| Compound | Rt, min | Class* |
| --- | --- | --- |
| Pentanal, 3-hydroxy-2-methyl- | 2.48 | AlkO |
| 1,3-Pentadiene | 2.55 | Alk |
| 3-Penten-1-yne | 2.74 | Alk |
| 2,5-Furandione, dihydro-3-methylene- | 2.86 | PscF |
| Dimethyl-[2-(5-methylcyclohexa-1,4-dienyloxy)ethyl]amine | 2.94 | N |
| 2-Propenal | 3.06 | AlkO |
| Furan, 2-methyl- | 3.15 | PscF |
| Furan, 3-methyl- | 3.26 | PscF |
| Allyl ethyl ether | 3.40 | Psc |
| 1,5-Heptadiene, 2-methyl-, (Z)- | 3.57 | Alk |
| 1-Oxetan-2-one, 4-methyl-3-methylene- | 4.14 | Psc |
| Toluene | 4.21 | T |
| 1H-Pyrrole, 1-methyl- | 5.05 | N5 |
| Pyridine | 5.48 | Pr |
| Pyridine, 2-methyl- | 5.79 | N6 |
| Cyclohexene, 3-(2-propynyl)- | 5.88 | Pscyclo |
| 1,3,5,7-Cyclooctatetraene | 6.24 | Pscyclo |
| Pyridine, 3-methyl- | 6.68 | N6 |
| Pyridine, 4-methyl- | 6.75 | N6 |
| 2-Cyclopenten-1-one | 7.48 | Pscyclo |
| 2-Cyclopenten-1-one, 2-methyl- | 7.60 | Pscyclo |
| 3-Furaldehyde | 8.19 | PscF |
| Furfural | 8.66 | PscF |
| Furan, 2,3-dihydro-5-methyl- | 8.75 | PscF |
| Benzene, 1-propynyl- | 8.99 | Ar |
| 1-(3H-Imidazol-4-yl)-ethanone | 9.16 | N |
| Pyrrole | 9.25 | N5 |
| Benzaldehyde | 9.45 | Ar |
| 1H-Pyrrole, 2-methyl- | 9.68 | N5 |
| 1H-Pyrrole, 3-methyl- | 9.89 | N5 |
| 2-Furancarboxaldehyde, 5-methyl- | 9.99 | PscF |
| Benzofuran, 2-methyl- | 10.28 | Psc |
| Bicyclo[2.2.2]octa-2,5-diene-2-carbonitrile | 10.47 | N |
| Acetophenone | 10.96 | Ar |
| Benzoxazole, 2-methyl- | 11.25 | N |
| 4-Amino-2(1H)-pyridinone | 11.35 | N |
| o-(p-Chlorophenyl) S-(2-(3-phenylureido)ethyl) thiocarbonate | 11.61 | Ar |
| Propanamide, 2-hydroxy-2-methyl-N-phenyl- | 12.10 | N |
| Methoxyacetic acid, 4-tridecyl ester | 12.18 | AlkO |
| Phenol, 2-methoxy- | 13.23 | Ar |
| 3-Pyridinecarbonitrile | 13.85 | N6 |
| Benzyl nitrile | 14.03 | N |
| Phenol, 2-methyl- | 14.65 | Ar |
| Phenol | 14.73 | Ph |
| 1H-Inden-1-one, 2,3-dihydro- | 15.01 | Psc |
| Benzenepropanenitrile | 15.18 | N |
| p-Cresol | 15.47 | Ar |
| Phenol, 3-methyl- | 15.55 | Ar |
| Pyrazine, 2-(n-propyl)- | 16.35 | N |

*Classes: N6- pyridines heterocycles, N5- pyrroles heterocycles, N - other nitrogen contain compounds, PscF - polysaccharide fragments with furanes, Pscyclo - cycloalkanes probably polysaccharide fragments, Psc - other polysaccharide fragments, Alk - Acyclic alkanes, AlkO - Acyclyc substituted alkanes, Ar - aromatic contain compounds, Individual compounds: Bz - benzene, Ph - phenole, T - toluene, Pr - pyridine

**Table S4.** An averages and standard deviations for relative abundance (averages, %) of compounds groups and individual substances for thermostable organic matter of Chernozems of different land management.

| Averages | | | | | | |
| --- | --- | --- | --- | --- | --- | --- |
| Chernozems | Protocalcic | | Endocalcic | | Pantocalcic | |
| Land managment | NT | CT | NT | CT | NT | CT |
| N-contain substances | | | | | | |
| N6 | 5 | 4 | 4 | 3 | 4 | 3 |
| N5 | 13 | 13 | 13 | 12 | 12 | 12 |
| N | 10 | 10 | 9 | 10 | 10 | 10 |
| Pr | 6 | 6 | 7 | 8 | 8 | 6 |
| Pollyschcarides fragments | | | | | | |
| PscF | 17 | 19 | 18 | 19 | 15 | 15 |
| Pscyclo | 8 | 8 | 8 | 6 | 7 | 8 |
| Psc | 4 | 4 | 3 | 3 | 3 | 3 |
| Acyclyc alkanes | | | | | | |
| Alk | 11 | 10 | 11 | 13 | 14 | 13 |
| AlkO | 3 | 3 | 3 | 3 | 4 | 3 |
| Aromatric compounds | | | | | | |
| Ar | 8 | 7 | 6 | 5 | 4 | 6 |
| Bz | 3 | 3 | 3 | 3 | 3 | 3 |
| Ph | 5 | 5 | 6 | 5 | 5 | 6 |
| Toluene | 4 | 4 | 4 | 4 | 5 | 4 |
| Standard deviation | | | | | | |
| N-contain substances | | | | | | |
| N6 | 0.6 | 1.2 | 1.1 | 1.3 | 0.4 | 0.5 |
| N5 | 0.6 | 0.5 | 0.6 | 0. 5 | 0.7 | 0.4 |
| N | 0.2 | 0.2 | 0.6 | 0.5 | 0.5 | 0.4 |
| Pr | 0.6 | 0.4 | 0.7 | 0.8 | 0.4 | 0.7 |
| Pollyschcarides fragments | | | | | | |
| PscF | 1.0 | 2.1 | 1.0 | 2.2 | 1.0 | 0.7 |
| Pscyclo | 0.4 | 1.0 | 0.8 | 0.8 | 0.6 | 0.5 |
| Psc | 0.4 | 0.1 | 0.5 | 0.1 | 0.3 | 0.4 |
| Acyclyc alkanes | | | | | | |
| Alk | 0.4 | 1.4 | 1.0 | 1.6 | 1.6 | 1.6 |
| AlkO | 0.6 | 0.5 | 0.2 | 0.5 | 0.4 | 0.6 |
| Aromatric compounds | | | | | | |
| Ar | 0.8 | 1.0 | 0.8 | 0.4 | 1.7 | 0.9 |
| Bz | 0.1 | 0.5 | 0.3 | 0.3 | 0.2 | 0.7 |
| Ph | 0.2 | 0.3 | 0.3 | 0.4 | 0.5 | 0.5 |
| Toluene | 1.5 | 0.5 | 0.4 | 0.9 | 0.5 | 0.2 |

**Table S5.** An eigenvectors from PCA of TS OM composition.

| Compound | PC1 | Compound | PC2 |
| --- | --- | --- | --- |
| Ar | **0.381** | **PscF** | 0.538 |
| N6 | **0.337** | **N5** | 0.507 |
| Pscyclo | 0.256 | **N** | 0.447 |
| Psc | 0.254 | Psc | 0.227 |
| Bz | 0.227 | Pr | 0.057 |
| N5 | 0.049 | Ar | 0.013 |
| N | -0.009 | Alk | -0.02 |
| PscF | -0.127 | Ph | -0.07 |
| Ph | -0.232 | AlkO | -0.141 |
| T | -0.289 | Bz | -0.161 |
| AlkO | **-0.326** | N6 | -0.184 |
| Pr | **-0.341** | Pscyclo | -0.191 |
| Alk | **-0.426** | **T** | -0.278 |

Bold font highlighted the greatest absolute values

Table S6. Correlation coefficients between TL and TS moieties*

| Correlation between TL and TS moieties for all soil (general matrix, n=29) | | | | | | | | | |
| --- | --- | --- | --- | --- | --- | --- | --- | --- | --- |
|  | TL OM | | | | | | | | |
| TS OM | 3-Furaldehyde | Furfural | | 2-Furancarboxaldehyde, 5-methyl- | | Pyrroles | | Phenol | Me-phenols |
| Alk | **-0.58** | **-0.73** | | **-0.68** | | 0.09 | | 0.25 | **0.41** |
| AlkO | -0.20 | -0.30 | | -0.27 | | -0.13 | | -0.11 | -0.03 |
| Bz | 0.25 | 0.36 | | 0.33 | | -0.11 | | -0.16 | -0.24 |
| Ar | **0.43** | **0.57** | | **0.57** | | ***-0.37*** | | **-0.39** | **-0.45** |
| Pr | -0.36 | **-0.53** | | **-0.66** | | 0.30 | | 0.35 | **0.44** |
| N6 | 0.34 | **0.49** | | **0.41** | | -0.31 | | **-0.39** | **-0.37** |
| N | 0.25 | ***0.46*** | | ***0.65*** | | 0.02 | | -0.12 | -0.26 |
| Ph | 0.07 | -0.13 | | **-0.38** | | 0.09 | | 0.22 | 0.34 |
| Pscyclo | 0.09 | 0.16 | | 0.07 | | -0.26 | | -0.22 | -0.29 |
| PscF | **0.47** | **0.46** | | **0.40** | | 0.08 | | -0.11 | -0.29 |
| Psc | 0.26 | **0.49** | | **0.67** | | -0.19 | | -0.31 | -0.34 |
| T | -0.17 | -0.27 | | -0.18 | | -0.02 | | 0.03 | 0.18 |
| N5 | **0.43** | **0.59** | | **0.56** | | -0.15 | | -0.34 | **-0.53** |
| Correlation beetwen TL and TS moieties for land managments | | | | | | | | | |
|  | NT (n=14) | | | | CT (n=15) | | | | |
|  | Pyridine | | Indoles | | Pyridine | | Indole | | |
| Alk | 0.06 | | **0.79** | | -0.12 | | **0.71** | | |
| AlkO | -0.05 | | 0.47 | | -0.15 | | 0.41 | | |
| Bz | 0.14 | | -0.55 | | 0.02 | | -0.32 | | |
| Ar | -0.06 | | **-0.71** | | -0.39 | | -0.16 | | |
| Pr | -0.03 | | **0.70** | | 0.31 | | 0.23 | | |
| N6 | -0.37 | | -0.47 | | -0.10 | | -0.30 | | |
| N | -0.05 | | -0.44 | | 0.32 | | ***-0.69*** | | |
| Ph | -0.26 | | 0.07 | | 0.01 | | 0.17 | | |
| Pscyclo | -0.47 | | -0.52 | | -0.20 | | 0.22 | | |
| PscF | 0.31 | | ***-0.57*** | | 0.24 | | **-0.55** | | |
| Psc | 0.24 | | -0.27 | | -0.25 | | **-0.60** | | |
| T | 0.05 | | 0.24 | | -0.13 | | 0.37 | | |
| N5 | 0.21 | | **-0.71** | | -0.01 | | -0.42 | | |

*Significant correlations are marked bold font; false correlations are highlighted by red italic (see Fig S2-S4)

Fig. S2. Correlation fields for the general data matrix (n=29), false correlations are mark by red ovals

Fig. S3. Correlation fields for the NT data matrix (n=14), false correlations mark by red ovals

Fig. S4. Correlation fields for the CT data matrix (n=15), false correlations mark by red ovals
